# Supplementary material for: Interrupted time series analysis of cannabis coding in Colorado during the ICD-10-CM transition
Source: PubMed Central journal article supplement — Inj Prev. 2021 Mar 4;27(Suppl 1):i66–70. doi: 10.1136/injuryprev-2019-043511 (PMC7948183; doi:10.1136/injuryprev-2019-043511), 2021-03-04
Supplement: injuryprev-2019-043511supp001.pdf [file injuryprev-2019-043511supp001.pdf]

**Appendix 1.** ICD-9-CM and ICD-10-CM cannabis and psychodysleptics discharge codes with descriptions

| ICD-9-CM Code                                                                              | Description                                                       | Note                                                                |
|--------------------------------------------------------------------------------------------|-------------------------------------------------------------------|---------------------------------------------------------------------|
| <b>Cannabis dependence, 304.3</b>                                                          |                                                                   |                                                                     |
| 304.30                                                                                     | Cannabis dependence – unspecified                                 |                                                                     |
| 304.31                                                                                     | Cannabis dependence – continuous                                  |                                                                     |
| 304.32                                                                                     | Cannabis dependence – episodic                                    |                                                                     |
| 304.33                                                                                     | Cannabis dependence – in remission                                |                                                                     |
| <b>Cannabis abuse, 305.2</b>                                                               |                                                                   |                                                                     |
| 305.20                                                                                     | Cannabis abuse – unspecified                                      |                                                                     |
| 305.21                                                                                     | Cannabis abuse – continuous                                       |                                                                     |
| 305.22                                                                                     | Cannabis abuse – episodic                                         |                                                                     |
| 305.23                                                                                     | Cannabis abuse – in remission                                     |                                                                     |
| <b>Poisoning – psychodysleptics [hallucinogens], 969.6</b>                                 |                                                                   | No sub-codes                                                        |
| <b>Accidental poisoning by psychodysleptics [hallucinogens], E854.1</b>                    |                                                                   | No sub-codes                                                        |
| <b>Psychodysleptics [hallucinogens] causing adverse effects in therapeutic use, E939.6</b> |                                                                   | No sub-codes                                                        |
| ICD-10-CM Code                                                                             | Description                                                       | Note                                                                |
| <b>Cannabis abuse, F12.1</b>                                                               |                                                                   |                                                                     |
| F12.10                                                                                     | Cannabis abuse, uncomplicated                                     |                                                                     |
| F12.11                                                                                     | Cannabis abuse, in remission                                      | Added in FY 2018 (effective Oct 1, 2017)                            |
| F12.120                                                                                    | Cannabis abuse with intoxication, uncomplicated                   |                                                                     |
| F12.121                                                                                    | Cannabis abuse with intoxication delirium                         |                                                                     |
| F12.122                                                                                    | Cannabis abuse with intoxication with perceptual disturbance      |                                                                     |
| F12.129                                                                                    | Cannabis abuse with intoxication, unspecified                     |                                                                     |
| F12.13                                                                                     | Cannabis abuse with withdrawal                                    | Added in FY 2021 (effective Oct 1, 2020; not present in study data) |
| F12.150                                                                                    | Cannabis abuse with psychotic disorder with delusions             |                                                                     |
| F12.151                                                                                    | Cannabis abuse with psychotic disorder with hallucinations        |                                                                     |
| F12.159                                                                                    | Cannabis abuse with psychotic disorder, unspecified               |                                                                     |
| F12.180                                                                                    | Cannabis abuse with cannabis-induced anxiety disorder             |                                                                     |
| F12.188                                                                                    | Cannabis abuse with other cannabis-induced disorder               |                                                                     |
| F12.19                                                                                     | Cannabis abuse with unspecified cannabis-induced disorder         |                                                                     |
| <b>Cannabis dependence, F12.2</b>                                                          |                                                                   |                                                                     |
| F12.20                                                                                     | Cannabis dependence, uncomplicated                                |                                                                     |
| F12.21                                                                                     | Cannabis dependence, in remission                                 |                                                                     |
| F12.220                                                                                    | Cannabis dependence with intoxication, uncomplicated              |                                                                     |
| F12.221                                                                                    | Cannabis dependence with intoxication delirium                    |                                                                     |
| F12.222                                                                                    | Cannabis dependence with intoxication with perceptual disturbance |                                                                     |
| F12.229                                                                                    | Cannabis dependence with intoxication, unspecified                |                                                                     |
| F12.23                                                                                     | Cannabis dependence with withdrawal                               | Added in FY 2019 (effective Oct 1, 2018)                            |
| F12.250                                                                                    | Cannabis dependence with psychotic disorder with delusions        |                                                                     |
| F12.251                                                                                    | Cannabis dependence with psychotic disorder with hallucinations   |                                                                     |
| F12.259                                                                                    | Cannabis dependence with psychotic disorder, unspecified          |                                                                     |
| F12.280                                                                                    | Cannabis dependence with cannabis-induced anxiety disorder        |                                                                     |
| F12.288                                                                                    | Cannabis dependence with other cannabis-induced disorder          |                                                                     |
| F12.29                                                                                     | Cannabis dependence with unspecified cannabis-induced disorder    |                                                                     |

| ICD-10-CM Code                                                                                  | Description                                                                                | Note                                        |
|-------------------------------------------------------------------------------------------------|--------------------------------------------------------------------------------------------|---------------------------------------------|
| <b>Cannabis use, F12.9</b>                                                                      |                                                                                            |                                             |
| F12.90                                                                                          | Cannabis use, unspecified, uncomplicated                                                   |                                             |
| F12.920                                                                                         | Cannabis use, unspecified with intoxication, uncomplicated                                 |                                             |
| F12.921                                                                                         | Cannabis use, unspecified with intoxication delirium                                       |                                             |
| F12.922                                                                                         | Cannabis use, unspecified with intoxication with perceptual disturbance                    |                                             |
| F12.929                                                                                         | Cannabis use, unspecified with intoxication, unspecified                                   |                                             |
| F12.93                                                                                          | Cannabis use, unspecified with withdrawal                                                  | Added in FY 2019<br>(effective Oct 1, 2018) |
| F12.950                                                                                         | Cannabis use, unspecified with psychotic disorder with delusions                           |                                             |
| F12.951                                                                                         | Cannabis use, unspecified with psychotic disorder with hallucinations                      |                                             |
| F12.959                                                                                         | Cannabis use, unspecified with psychotic disorder, unspecified                             |                                             |
| F12.980                                                                                         | Cannabis use, unspecified with anxiety disorder                                            |                                             |
| F12.988                                                                                         | Cannabis use, unspecified with other cannabis-induced disorder                             |                                             |
| F12.99                                                                                          | Cannabis use, unspecified with unspecified cannabis-induced disorder                       |                                             |
| <b>Poisoning by and adverse effects of cannabis (derivatives), T40.7</b>                        |                                                                                            |                                             |
| T40.7X1A                                                                                        | Poisoning by cannabis (derivatives), accidental (unintentional) initial encounter          |                                             |
| T40.7X2A                                                                                        | Poisoning by cannabis (derivatives), intentional self-harm initial encounter               |                                             |
| T40.7X3A                                                                                        | Poisoning by cannabis (derivatives), assault initial encounter                             |                                             |
| T40.7X4A                                                                                        | Poisoning by cannabis (derivatives), undetermined initial encounter                        |                                             |
| T40.7X5A                                                                                        | Adverse effect of cannabis (derivatives), initial encounter                                |                                             |
| <b>Poisoning by and adverse effects of lysergide [LSD], T40.8</b>                               |                                                                                            |                                             |
| T40.8X1A                                                                                        | Poisoning by lysergide [LSD] (accidental) initial encounter                                |                                             |
| T40.8X2A                                                                                        | Poisoning by lysergide [LSD] (self-harm) initial encounter                                 |                                             |
| T40.8X3A                                                                                        | Poisoning by lysergide [LSD] (assault) initial encounter                                   |                                             |
| T40.8X4A                                                                                        | Poisoning by lysergide [LSD] (undetermined) initial encounter                              |                                             |
| <b>Poisoning by and adverse effects of unspecified psychodysleptics [hallucinogens], T40.90</b> |                                                                                            |                                             |
| T40.901A                                                                                        | Poisoning by unspecified psychodysleptics [hallucinogens] (accidental) initial encounter   |                                             |
| T40.902A                                                                                        | Poisoning by unspecified psychodysleptics [hallucinogens] (self-harm) initial encounter    |                                             |
| T40.903A                                                                                        | Poisoning by unspecified psychodysleptics [hallucinogens] (assault) initial encounter      |                                             |
| T40.904A                                                                                        | Poisoning by unspecified psychodysleptics [hallucinogens] (undetermined) initial encounter |                                             |
| T40.905A                                                                                        | Adverse effect of unspecified psychodysleptics [hallucinogens] initial encounter           |                                             |
| <b>Poisoning by and adverse effects of other psychodysleptics [hallucinogens], T40.99</b>       |                                                                                            |                                             |
| T40.991A                                                                                        | Poisoning by other psychodysleptics [hallucinogens] (accidental) initial encounter         |                                             |
| T40.992A                                                                                        | Poisoning by other psychodysleptics [hallucinogens] (self harm) initial encounter          |                                             |
| T40.993A                                                                                        | Poisoning by other psychodysleptics [hallucinogens] (assault) initial encounter            |                                             |
| T40.994A                                                                                        | Poisoning by other psychodysleptics [hallucinogens] (undetermined) initial encounter       |                                             |
| T40.995A                                                                                        | Adverse effect of other psychodysleptics [hallucinogens] initial encounter                 |                                             |

**Appendix 2.** Annual counts of ED and hospital discharges with ICD-9-CM and ICD-10-CM codes for cannabis use disorders (Indicator 1) and poisoning/adverse effects of psychodysleptics (Indicator 2), 2011-2018

| Coding Scheme | Year       | ED Discharges                                    |              |                                                                                |              |                   | Inpatient Hospital Discharges                    |              |                                                                                |              |                  |
|---------------|------------|--------------------------------------------------|--------------|--------------------------------------------------------------------------------|--------------|-------------------|--------------------------------------------------|--------------|--------------------------------------------------------------------------------|--------------|------------------|
|               |            | Indicator 1: Cannabis use disorders <sup>a</sup> |              | Indicator 2: Poisoning by and adverse effects of psychodysleptics <sup>b</sup> |              | Total             | Indicator 1: Cannabis use disorders <sup>a</sup> |              | Indicator 2: Poisoning by and adverse effects of psychodysleptics <sup>b</sup> |              | Total            |
| ICD-9-CM      | 2011       | 7,993                                            | 0.60%        | 265                                                                            | 0.02%        | 1,327,248         | 6,228                                            | 1.30%        | 124                                                                            | 0.03%        | 480,048          |
|               | 2012       | 9,767                                            | 0.69%        | 274                                                                            | 0.02%        | 1,424,217         | 6,625                                            | 1.40%        | 143                                                                            | 0.03%        | 473,777          |
|               | 2013       | 13,815                                           | 0.85%        | 474                                                                            | 0.03%        | 1,620,114         | 8,179                                            | 1.76%        | 161                                                                            | 0.03%        | 464,870          |
|               | 2014       | 17,767                                           | 1.01%        | 748                                                                            | 0.04%        | 1,756,313         | 11,364                                           | 2.43%        | 168                                                                            | 0.04%        | 468,157          |
|               | Q1-Q3 2015 | 10,126                                           | 0.73%        | 468                                                                            | 0.03%        | 1,389,344         | 10,825                                           | 3.00%        | 163                                                                            | 0.05%        | 360,379          |
| ICD-10-CM     | Q4 2015    | 4,022                                            | 0.87%        | 196                                                                            | 0.04%        | 462,033           | 3,907                                            | 3.31%        | 68                                                                             | 0.06%        | 118,214          |
|               | 2016       | 19,876                                           | 1.03%        | 803                                                                            | 0.04%        | 1,920,533         | 16,773                                           | 3.49%        | 260                                                                            | 0.05%        | 480,812          |
|               | 2017       | 21,106                                           | 1.10%        | 943                                                                            | 0.05%        | 1,911,468         | 16,480                                           | 3.41%        | 278                                                                            | 0.06%        | 483,113          |
|               | 2018       | 21,523                                           | 1.13%        | 1,237                                                                          | 0.06%        | 1,911,545         | 17,064                                           | 3.54%        | 295                                                                            | 0.06%        | 481,536          |
| <b>Total</b>  |            | <b>125,995</b>                                   | <b>0.92%</b> | <b>5,408</b>                                                                   | <b>0.04%</b> | <b>13,722,815</b> | <b>97,445</b>                                    | <b>2.56%</b> | <b>1,660</b>                                                                   | <b>0.04%</b> | <b>3,810,906</b> |

<sup>a</sup> Indicator 1: Cannabis use disorders included ICD-9-CM codes 304.3X and 305.2X and all ICD-10-CM F12 codes

<sup>b</sup> Indicator 2: Poisoning and adverse effects of psychodysleptics included ICD-9-CM codes 969.6, E854.1, and E939.6, and ICD-10-CM codes T40.7X1A-T40.7X5A, T40.8X1A-T40.8X4A, T40.901A-T40.905A, T40.991A-T40.995A

Data source: Colorado Hospital Association, Jan 1, 2011-Dec 31, 2018

**Appendix 3.** Total number of cannabis ICD-10-CM codes in ED and hospital discharges from January 1, 2016 through December 31, 2018.

| ICD-10-CM Code                                                                                                                                       | Frequency (%)  |                  |
|------------------------------------------------------------------------------------------------------------------------------------------------------|----------------|------------------|
|                                                                                                                                                      | ED Visits      | Hospitalizations |
| <b>F12.10:</b> Cannabis abuse (uncomplicated)                                                                                                        | 17,764 (25.42) | 15,153 (27.38)   |
| <b>F12.11:</b> Cannabis abuse, in remission                                                                                                          | 38 (0.05)      | 174 (0.31)       |
| <b>F12.12, -0,-1,-2,-9:</b> Cannabis abuse with intoxication (uncomplicated, with delirium, with perceptual disturbance, and unspecified)            | 1,141 (1.63)   | 184 (0.33)       |
| <b>F12.15, -0, -1, -9:</b> Cannabis abuse with psychotic disorder (with delusions, with hallucinations, unspecified)                                 | 71 (0.1)       | 163 (0.29)       |
| <b>F12.18, -0, -8:</b> Cannabis abuse with other cannabis-induced disorder (cannabis-induced anxiety disorder, cannabis-induced disorder)            | 823 (1.18)     | 324 (0.59)       |
| <b>F12.19:</b> Cannabis abuse with unspecified cannabis-induced disorder                                                                             | 100 (0.14)     | 73 (0.13)        |
| <b>F12.20:</b> Cannabis dependence uncomplicated                                                                                                     | 2,227 (3.19)   | 4,386 (7.92)     |
| <b>F12.21:</b> Cannabis dependence in remission                                                                                                      | 134 (0.19)     | 226 (0.41)       |
| <b>F12.22, -0,-1,-2,-9:</b> Cannabis dependence with intoxication (uncomplicated, with delirium, with perceptual disturbance, and unspecified)       | 85 (0.12)      | 43 (0.08)        |
| <b>F12.23:</b> Cannabis dependence with withdrawal                                                                                                   | <11            | 14 (0.03)        |
| <b>F12.25, -0, -1, -9:</b> Cannabis dependence with psychotic disorder (with delusions, with hallucinations, unspecified)                            | 25 (0.04)      | 126 (0.23)       |
| <b>F12.28, -0, -8:</b> Cannabis dependence with other cannabis-induced disorder (cannabis-induced anxiety disorder, other cannabis-induced disorder) | 116 (0.17)     | 173 (0.31)       |
| <b>F12.29:</b> Cannabis dependence with unspecified cannabis-induced disorder                                                                        | 52 (0.07)      | 110 (0.2)        |
| <b>F12.90:</b> Cannabis use, unspecified (uncomplicated)                                                                                             | 39,986 (57.22) | 31,230 (56.42)   |
| <b>F12.92, -0,-1,-2,-9:</b> Cannabis use, unspecified with intoxication (uncomplicated, with delirium, with perceptual disturbance, and unspecified) | 2,194 (3.14)   | 393 (0.71)       |
| <b>F12.95, -0, -1, -9:</b> Cannabis use, unspecified with psychotic disorder (with delusions, with hallucinations, unspecified)                      | 84 (0.12)      | 203 (0.37)       |
| <b>F12.98, -0, -8:</b> Cannabis use, unspecified with other cannabis-induced disorder (with anxiety disorder, with cannabis-induced disorder)        | 839 (1.2)      | 306 (0.55)       |
| <b>F12.99:</b> Cannabis use with unspecified cannabis-induced disorder                                                                               | 995 (1.42)     | 1,149 (2.08)     |
| <b>T40.7X1A:</b> Poisoning by cannabis (accidental) initial encounter                                                                                | 1,551 (2.22)   | 461 (0.83)       |
| <b>T40.7X2A:</b> Poisoning by cannabis (self-harm) initial encounter                                                                                 | 52 (0.07)      | 91 (0.16)        |
| <b>T40.7X3A:</b> Poisoning by cannabis (assault) initial encounter                                                                                   | <11            | 0 (0)            |
| <b>T40.7X4A:</b> Poisoning by cannabis (undetermined) initial encounter                                                                              | 84 (0.12)      | 29 (0.05)        |
| <b>T40.7X5A:</b> Poisoning by adverse effect of cannabis initial encounter                                                                           | 940 (1.35)     | 254 (0.46)       |
| <b>T40.8X1A:</b> Poisoning by lysergide [LSD] (accidental) initial encounter                                                                         | 352 (0.5)      | 34 (0.06)        |
| <b>T40.8X2A:</b> Poisoning by lysergide [LSD] (self-harm) initial encounter                                                                          | 25 (0.04)      | 9 (0.02)         |
| <b>T40.8X3A:</b> Poisoning by lysergide [LSD] (assault) initial encounter                                                                            | <11            | <11              |
| <b>T40.8X4A:</b> Poisoning by lysergide [LSD] (undetermined) initial encounter                                                                       | 115 (0.16)     | <11              |
| <b>T40.901A:</b> Poisoning by unspecified psychodysleptics [hallucinogens] (accidental) initial encounter                                            | 11 (0.02)      | <11              |
| <b>T40.902A:</b> Poisoning by unspecified psychodysleptics [hallucinogens] (self-harm) initial encounter                                             | <11            | <11              |
| <b>T40.903A:</b> Poisoning by unspecified psychodysleptics [hallucinogens] (assault) initial encounter                                               | 0 (0.0)        | 0 (0.0)          |

| ICD-10-CM Code                                                                                              | Frequency (%) |                  |
|-------------------------------------------------------------------------------------------------------------|---------------|------------------|
|                                                                                                             | ED Visits     | Hospitalizations |
| <b>T40.904A:</b> Poisoning by unspecified psychodysleptics [hallucinogens] (undetermined) initial encounter | <11           | 0 (0.0)          |
| <b>T40.905A:</b> Adverse effect of unspecified psychodysleptics [hallucinogens] initial encounter           | <11           | 0 (0.0)          |
| <b>T40.991A:</b> Poisoning by other psychodysleptics [hallucinogens] (accidental) initial encounter         | 37 (0.05)     | 18 (0.03)        |
| <b>T40.992A:</b> Poisoning by other psychodysleptics [hallucinogens] (self harm) initial encounter          | <11           | <11              |
| <b>T40.993A:</b> Poisoning by other psychodysleptics [hallucinogens] (assault) initial encounter            | <11           | 0 (0.0)          |
| <b>T40.994A:</b> Poisoning by other psychodysleptics [hallucinogens] (undetermined) initial encounter       | <11           | <11              |
| <b>T40.995A:</b> Adverse effect of other psychodysleptics [hallucinogens] initial encounter                 | 18 (0.03)     | <11              |
